# Supplementary material
Source: PubMed Central journal article supplement (PMC4979375)

**A Practical Solution for Dyspareunia in Breast Cancer Survivors: a randomized controlled trial**

**Goetsch, et al**

# Goetsch-Lim-Caughey Study

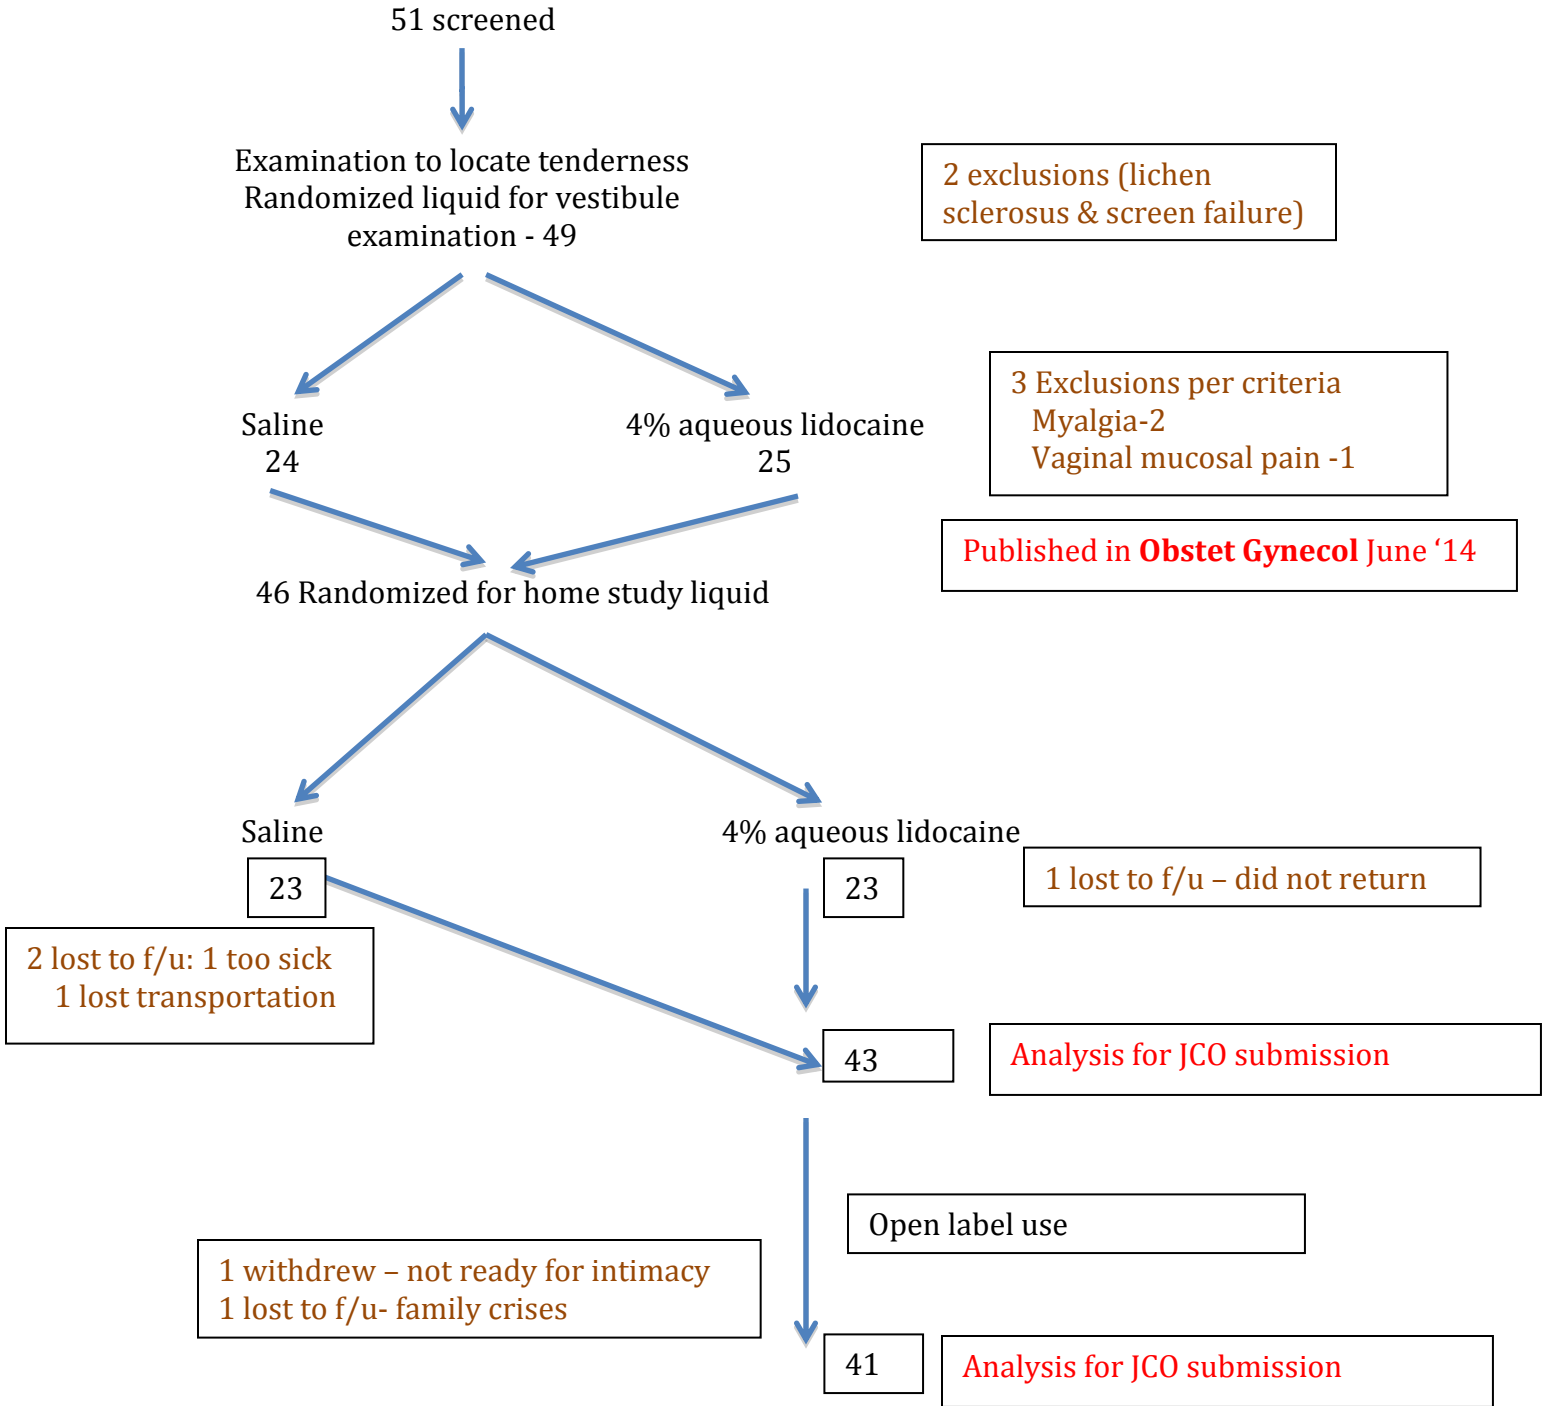

Supplement: supp_JCO.2014.60.7366_DS_JCO.2014.60.7366.pdf [file supp_JCO.2014.60.7366_DS_JCO.2014.60.7366.pdf]
